# Supplementary material
Source: Springer Nature journal article supplement (https://www.springermedizin.de/resource/supplementary/13229_2010_16_MOESM11_ESM.pdf/9675994)

Scen1 (Recessive)

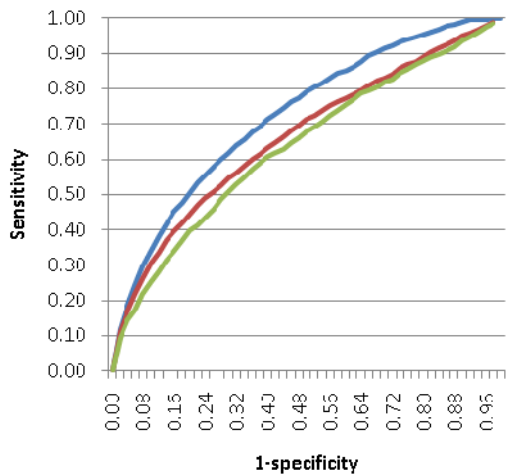

Scen1 (Multiplicative)

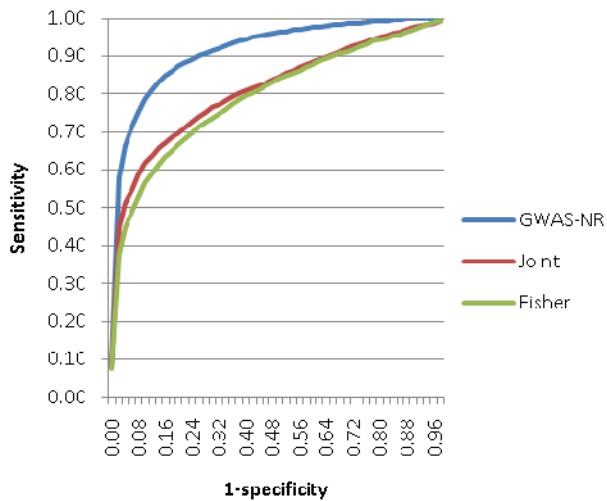

Scen1 (Dominant)

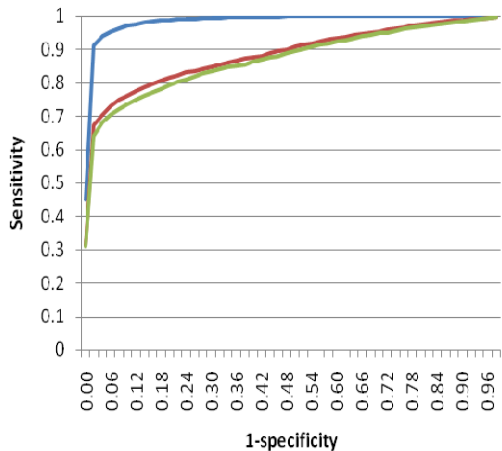

Scen1 (Additive)

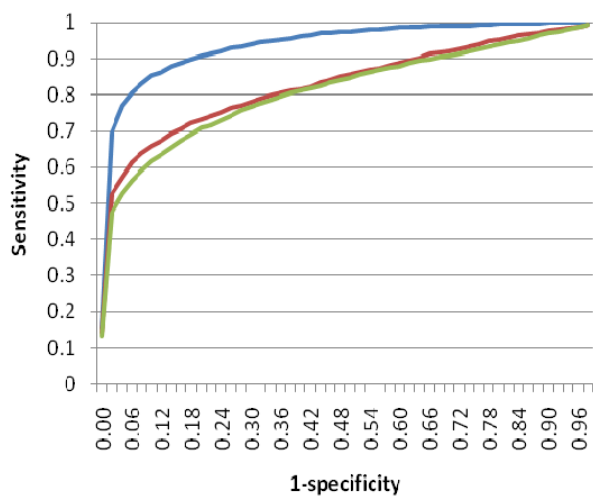

Supplement: MOESM11 [file 9675994]
